# Supplementary material
Source: Research Square preprint supplement (doi:10.21203/rs.3.rs-9359614/v1)
Supplement: Supplementary file 1 [file 0c756654e74e65c175094a4d.docx]

**Supplementary Table 2. Anterior segment optical coherence tomograph at postoperative 12 months.**

| **Variables** | **PEI+GSL (n=31)** | | | **PEI+GSL+GT (n=30)** | | **P** |
| --- | --- | --- | --- | --- | --- | --- |
| Total AOD250 (μm) | | | 0.14 ± 0.10 | 0.10 (0.09, 0.12) | 0.65 | |
| Nasal-AOD250(μm) | | | 0.13 (0.10, 0.16) | 0.10 ± 0.07 | 0.25 | |
| Inferior-AOD250(μm) | | | 0.11 ± 0.11 | 0.11 ± 0.08 | 0.88 | |
| Temporal-AOD250(μm) | | | 0.12 ± 0.10 | 0.11 (0.07, 0.12) | 0.81 | |
| Superior-AOD250(μm) | | | 0.19 ± 0.16 | 0.14 (0.11, 0.15) | 0.89 | |
| Total TISA250 (mm²) | | | 0.02 (0.02, 0.04) | 0.02 (0.01, 0.02) | 0.42 | |
| Nasal-TISA250 (mm²) | | | 0.02 (0.02, 0.03) | 0.02 ± 0.01 | 0.19 | |
| Inferior-TISA250 (mm²) | | | 0.01 (0.00, 0.02) | 0.02 ± 0.02 | 0.95 | |
| Temporal-TISA250 (mm²) | | | 0.02 ± 0.02 | 0.02 ± 0.01 | 0.39 | |
| Superior-TISA250 (mm²) | | | 0.03 ± 0.03 | 0.02 (0.02, 0.03) | 0.71 | |
| Total TIA250 (°) | | | 20.86 ± 12.63 | 18.73 (16.45, 22.20) | 0.86 | |
| Nasal-TIA250 (°) | 20.18 ± 12.46 | | | 17.73 ± 10.82 | 0.59 | |
| Inferior-TIA250 (°) | 15.17 ± 13.40 | | | 19.89 ± 13.95 | 0.38 | |
| Temporal-TIA250 (°) | 19.26 ± 13.05 | | | 19.61 ± 6.94 | 0.93 | |
| Superior-TIA250 (°) | 28.82 ± 17.79 | | | 20.05 (19.05, 28.60) | 0.54 | |
| Total ARA250 (mm²) | 0.02 (0.02, 0.04) | | | 0.02 (0.01, 0.03) | 0.25 | |
| Nasal-ARA250 (mm²) | 0.03 (0.02, 0.03) | | | 0.02 ± 0.02 | 0.14 | |
| Inferior-ARA250 (mm²) | 0.01 (0.00, 0.02) | | | 0.02 ± 0.02 | 0.55 | |
| Temporal-ARA250 (mm²) | | | 0.03 (0.01, 0.03) | 0.02 ± 0.02 | 0.36 | |
| Superior-ARA250 (mm²) | 0.04 ± 0.03 | | | 0.03 (0.02, 0.03) | 0.93 | |
| Total ITC (°) | 3.49 (2.97, 5.28) | | | 4.40 ± 2.89 | 0.57 | |
| Nasal-ITC (°) | 0.91 (0.42, 1.53) | | | 1.19 ± 0.89 | 0.99 | |
| Inferior-ITC (°) | 1.80 (1.36, 2.24) | | | 1.31 ± 1.15 | 0.21 | |
| Temporal-ITC (°) | 0.56 (0.34, 1.45) | | | 1.25 ± 0.68 | 0.88 | |
| Superior-ITC (°) | 0.59 (0.11, 1.07) | | | 0.98 ± 0.74 | 0.97 | |
| Total ITC index% | 52.89 ± 26.88 | | | 58.54 ± 25.85 | 0.59 | |
| Nasal-ITC index% | 47.44 ± 32.22 | | | 56.72 ± 34.01 | 0.47 | |
| Inferior-ITC index% | 81.00 (67.20, 100.00) | | | 67.55 ± 31.52 | 0.72 | |
| Temporal-ITC index% | 50.10 ± 33.43 | | | 63.89 ± 32.38 | 0.29 | |
| Superior-ITC index% | 41.35 ± 34.84 | | | 49.62 ± 31.45 | 0.53 | |
| Total AOD500 (μm) | 0.29 ± 0.16 | | | 0.24 (0.23, 0.28) | 0.76 | |
| Nasal-AOD500 (μm) | 0.27 ± 0.12 | | | 0.24 ± 0.11 | 0.71 | |
| Inferior-AOD500 (μm) | 0.21 ± 0.13 | | | 0.25 ± 0.12 | 0.53 | |
| Temporal-AOD500 (μm) | 0.25 ± 0.13 | | | 0.26 ± 0.10 | 0.95 | |
| Superior-AOD500 (μm) | 0.31 ± 0.25 | | | 0.36 (0.28, 0.36) | 0.39 | |
| Total TISA500 (mm²) | 0.08 ± 0.06 | | | 0.06 (0.05, 0.07) | 0.51 | |
| Nasal-TISA500 (mm²) | 0.07 (0.06, 0.09) | | | 0.06 ± 0.04 | 0.31 | |
| Inferior-TISA500 (mm²) | 0.06 ± 0.05 | | | 0.06 ± 0.04 | 0.73 | |
| Temporal-TISA500 (mm²) | | 0.07 ± 0.05 | | 0.06 ± 0.03 | 0.68 | |
| Superior-TISA500 (mm²) | 0.10 ± 0.08 | | | 0.08 (0.07, 0.10) | 0.95 | |
| Total TIA500 (°) | 24.67 ± 11.08 | | | 23.50 (22.40, 27.50) | 0.77 | |
| Nasal-TIA500 (°) | 23.60 ± 9.47 | | | 23.23 ± 9.07 | 0.92 | |
| Inferior-TIA500 (°) | 19.88 ± 10.21 | | | 24.18 ± 10.82 | 0.30 | |
| Temporal-TIA500 (°) | 23.04 ± 11.41 | | | 24.35 ± 6.64 | 0.73 | |
| Superior-TIA500 (°) | 30.26 ± 15.58 | | | 31.25 (28.48, 34.03) | 0.67 | |
| Total ARA500 (mm²) | 0.09 ± 0.07 | | | 0.07 (0.05, 0.08) | 0.43 | |
| Nasal-ARA500 (mm²) | 0.08 (0.06, 0.09) | | | 0.06 ± 0.04 | 0.24 | |
| Inferior-ARA500 (mm²) | 0.04 (0.02, 0.08) | | | 0.07 ± 0.04 | 0.98 | |
| Temporal-ARA500 (mm²) | | 0.07 ± 0.05 | | 0.07 ± 0.03 | 0.63 | |
| Superior-ARA500 (mm²) | 0.11 ± 0.08 | | | 0.09 (0.07, 0.10) | 0.97 | |
| Total AOD750 (μm) | 0.44 ± 0.19 | | | 0.48 (0.45, 0.50) | 0.40 | |
| Nasal-AOD750 (μm) | 0.42 ± 0.16 | | | 0.44 ± 0.15 | 0.77 | |
| Inferior-AOD750 (μm) | 0.37 ± 0.18 | | | 0.45 ± 0.14 | 0.19 | |
| Temporal-AOD750 (μm) | 0.43 ± 0.20 | | | 0.47 ± 0.14 | 0.60 | |
| Superior-AOD750 (μm) | 0.55 ± 0.30 | | | 0.61 (0.50, 0.64) | 0.42 | |
| TotalTISA750 (mm²) | 0.17 ± 0.09 | | | 0.15 (0.14, 0.18) | 0.91 | |
| Nasal-TISA750 (mm²) | 0.16 ± 0.09 | | | 0.14 ± 0.07 | 0.50 | |
| Inferior-TISA750 (mm²) | 0.13 ± 0.08 | | | 0.15 ± 0.07 | 0.42 | |
| Temporal-TISA750 (mm²) | | 0.15 ± 0.09 | | 0.16 (0.11, 0.17) | 0.96 | |
| Superior-TISA750 (mm²) | 0.22 ± 0.14 | | | 0.20 (0.16, 0.22) | 0.80 | |
| TotalTIA750 (°) | 27.16 ± 10.41 | | | 30.40 (27.50, 32.10) | 0.30 | |
| Nasal-TIA750 (°) | 25.82 ± 9.05 | | | 28.48 ± 7.56 | 0.42 | |
| Inferior-TIA750 (°) | 23.99 ± 10.23 | | | 29.34 ± 7.79 | 0.14 | |
| Temporal-TIA750 (°) | 27.25 ± 11.51 | | | 29.45 ± 6.10 | 0.55 | |
| Superior-TIA750 (°) | 32.73 ± 13.83 | | | 35.75 (33.35, 39.03) | 0.37 | |
| TotalARA750 (mm²) | 0.17 ± 0.09 | | | 0.15 (0.14, 0.18) | 0.99 | |
| Nasal-ARA750 (mm²) | 0.17 ± 0.09 | | | 0.15 ± 0.07 | 0.43 | |
| Inferior-ARA750 (mm²) | 0.14 ± 0.09 | | | 0.15 ± 0.08 | 0.59 | |
| Temporal-ARA750 (mm²) | | 0.16 ± 0.09 | | 0.16 ± 0.06 | 0.98 | |
| Superior-ARA750 (mm²) | 0.22 ± 0.15 | | | 0.20 (0.17, 0.22) | 0.79 | |

Statistics are based on Shapiro-Wilk normality test for each variable. Data were illustrated as median (IQR) - non-normal distribution; mean ± SD - normal distribution. P value was calculated using generalized estimating equations.**Abbreviations:** AOD, angle opening distance; TISA, trabecular–iris space area; TIA, trabecular–iris angle; ARA, angle recess area; ITC, iridotrabecular contact; ITC index, iridotrabecular contact index (%). Nasal, inferior, temporal and superior indicate quadrant-specific measurements; Total indicates overall value in average. Values with 250/500/750 indicate measurements taken at 250/500/750 μm from the scleral spur.
