# Supplementary material
Source: Research Square preprint supplement (doi:10.21203/rs.3.rs-9359614/v1)
Supplement: Supplementary file 2 [file 3ad7231cded434591058993f.docx]

**Table 3. Change of Intraocular Pressure from the baseline between the two groups after Surgery.**

| **Time Point** | **PEI+GSL (n=31)** | | | |  | **PEI+GSL+GT (n=30)** | | | |
| --- | --- | --- | --- | --- | --- | --- | --- | --- | --- |
| **IOP** | **Abs. Red.** | **% Red.** | **P** |  | **IOP** | **Abs. Red.** | **% Red.** | **P** |
| Baseline | 50.00 (39.00-58.00) | - | - | - |  | 50.00 (40.00-60.00) | - | - | - |
| Post-op Day 1 | 16.00 (12.50-20.00) | 29.58 ± 12.32 | 64.43 (55.76-74.23) | <0.01* |  | 12.50 (10.00-19.25) | 32.20 ± 16.16 | 71.67 (50.78-80.39) | <0.01* |
| Post-op Day 7 | 15.52 ± 3.61 | 31.94 ± 10.29 | 66.05 ± 10.17 | <0.01* |  | 14.00 (13.00-15.75) | 32.57 ± 14.35 | 70.21 (57.36-73.91) | <0.01* |
| Post-op 1Month | 15.23 ± 2.87 | 32.23 ± 10.77 | 69.27 (61.72-73.03) | <0.01* |  | 15.00 (13.25-16.75) | 32.07 ± 14.94 | 69.80 (57.42-75.00) | <0.01* |
| Post-op 3 Months | 15.00 (14.00-18.00) | 30.48 ± 11.15 | 65.96 (56.64-72.82) | <0.01* |  | 15.57 ± 3.57 | 31.83 ± 13.68 | 67.63 (55.04-74.83) | <0.01* |
| Post-op 6 Months | 16.26 ± 3.17 | 31.13 ± 10.97 | 65.22 (60.38-73.08) | <0.01* |  | 16.00 (14.25-19.00) | 30.63 ± 13.38 | 63.37 (54.90-73.00) | <0.01* |
| Post-op 12 Months | 16.26 ± 3.03 | 31.13 ± 11.16 | 67.30 (59.50-72.63) | <0.01* |  | 16.63 ± 3.29 | 30.77 ± 13.73 | 61.43 (56.31-71.65) | <0.01* |

Table 3 shows IOP at each time point and reduction from baseline. Statistics are based on Shapiro-Wilk normality test for each variable: median (IQR) - non-normal distribution; mean ± SD - normal distribution. Abbreviation: PEI, phacoemulsification; GSL, goniosynechialysis; GT, goniotomy; Post-op, postoperative; Abs. Red. = Absolute Reduction (basicIOP - Post-IOP, mmHg); % Red. = Percentage Reduction. P value was calculated using generalized estimated equations.
