# Supplementary material
Source: Research Square preprint supplement (doi:10.21203/rs.3.rs-9359614/v1)
Supplement: Supplementary file 3 [file 6d889b3b22850c0e751a68e8.docx]

**Table 4. Change of the medications between the two groups after Surgery.**

| **Time Point** | **PEI+GSL (n=31)** | **PEI+GSL+GT (n=30)** | **P** |
| --- | --- | --- | --- |
| Baseline | 3.0 ± 0.9 | 2.9 ± 1.0 | 0.87 |
| Post-op Day 1 | 0.13 ± 0.50 | 0.20 ± 0.81 | 0.96 |
| Post-op Day 7 | 0.39 ± 0.80 | 0.37 ± 0.93 | 0.80 |
| Post-op 1Month | 0.32 ± 0.75 | 0.33 ± 0.88 | 1.00 |
| Post-op 3 Months | 0.55 ± 1.09 | 0.40 ± 0.93 | 0.71 |
| Post-op 6 Months | 0.71 ± 1.30 | 0.53 ± 1.14 | 0.72 |
| Post-op 12 Months | 0.65 ± 1.17 | 0.70 ± 1.24 | 0.80 |

Table 4 shows medications at each time point. Statistics are based on mean ± SD. **Abbreviations:** PEI, phacoemulsification; GSL, goniosynechialysis; GT, goniotomy; Post-op, postoperative. P value was calculated using generalized estimated equation.
