# Supplementary material
Source: Research Square preprint supplement (doi:10.21203/rs.3.rs-9359614/v1)
Supplement: Supplementary file 4 [file 85835d038edf38d93f3ea26e.docx]

**Table 1. Baseline Characteristics.**

| **Variable** | **PEI+GSL (n=31)** | **PEI+GSL+GT (n=30)** | **P** |
| --- | --- | --- | --- |
| Gender (Male), n (%) | 14 (45.2%) | 14 (46.7%) | 0.71 |
| Age, years | 62.23 ± 10.55 | 62.20 ± 8.16 | 0.82 |
| BCVA LogMAR | 1.03 ± 1.11 | 0.92 ± 0.98 | 0.17 |
| Vertical C/D ratio | 0.80 (0.70-0.90) | 0.80 (0.70-1.00) | 0.87 |
| MD (dB) | -15.34 ± 3.22 | -15.80± 2.75 | 0.89 |
| PSD (dB) | 6.62 ± 2.13 | 6.72 ± 1.91 | 0.84 |
| Duration (month) | 5.00 (2.00-12.00) | 2.50 (0.81-6.00) | 0.18 |
| AL (mm) | 22.67 ± 1.06 | 22.20 ± 0.71 | 0.17 |
| CCT (μm) | 511 (504-538) | 550 (532-562) | 0.99 |
| ACD-before (mm) | 1.98 ± 0.46 | 2.03 ± 0.28 | 0.78 |
| ACD-after (mm) | 3.52 ± 0.26 | 3.46 ± 0.25 | 0.61 |
| PEI open range (°) | 150 (0-180) | 30 (0-180) | 0.08 |
| GT RANGE (°) | 0 (0-0) | 120 (90-120) | **<0.01** |
| Basic IOP (mmHg) | 50 (39-58) | 50 (40-60) | 0.79 |
| PRE-IOP (mmHg) | 24 (17-31) | 26 (17-35) | 0.55 |
| PRE-MED (n) | 3.00 (2.00-4.00) | 3.00 (3.00-4.00) | 0.87 |

Table 1 presents baseline characteristics. Continuous variables are presented as mean ± SD (normal distribution) or median (IQR) (non-normal distribution). GEE models account for clustering of eyes within patients. **Abbreviations:** BCVA, best-corrected visual acuity; LogMAR, logarithm of the minimum angle of resolution; Vertical C/D ratio, vertical cup-to-disc ratio; MD, mean deviation; PSD, pattern standard deviation; AL, axial length; CCT, central corneal thickness; ACD, anterior chamber depth; PEI, phacoemulsification; GSL, goniosynechialysis; GT, goniotomy; IOP, intraocular pressure; PRE-IOP, preoperative intraocular pressure; PRE-MED, number of preoperative glaucoma medications.
