# Supplementary material
Source: Research Square preprint supplement (doi:10.21203/rs.3.rs-9359614/v1)
Supplement: Supplementary file 5 [file 8c0cfb7bd0fae5a16d06b92c.docx]

**Table 2. Comparison of Intraocular Pressure between the two groups after Surgery.**

| **Time Point** | **PEI+GSL (n=31)** | **PEI+GSL+GT (n=30)** | **P** |
| --- | --- | --- | --- |
| Post-op Day 1 | 16.0 (12.5-20.0) | 12.5 (10.0-19.2) | 0.17 |
| Post-op Day 7 | 15.5 ± 3.6 | 14.0 (13.0-15.8) | 0.55 |
| Post-op 1Month | 15.2 ± 2.9 | 15.0 (13.2-16.8) | 0.84 |
| Post-op 3 Months | 15.0 (14.0-18.0) | 15.6 ± 3.6 | 0.38 |
| Post-op 6 Months | 16.3 ± 3.2 | 16.0 (14.2-19.0) | 0.44 |
| Post-op 12 Months | 16.3 ± 3.0 | 16.6 ± 3.3 | 0.62 |

Table 2 presents the intraocular pressure change after surgery. Data are presented as mean ± SD for normally distributed variables and median (IQR) for non-normally distributed variables. P value was calculated using general estimated equations. Abbreviation: PEI, phacoemulsification; GSL, goniosynechialysis; GT, goniotomy; Post-op, postoperative.
