# Supplementary material
Source: Research Square preprint supplement (doi:10.21203/rs.3.rs-9359614/v1)
Supplement: Supplementary file 7 [file bd7472bc4ec75969099365fb.docx]

**Supplementary Table 1. Gonioscopy at postoperative 12 months.**

| **Degree of angle opening** | **PEI+GSL (n=31)** | **PEI+GSL+GT (n=30)** | **P** |
| --- | --- | --- | --- |
| Superior (S) (°) | 33.3 (0.0-100.0) | 0.0 (0.0-33.3) | 0.05 |
| Nasal (N) (°) | 33.3 (0.0-66.7) | 66.7 (33.3-66.9) | 0.26 |
| Inferior (I) (°) | 33.3 (0.0-66.7) | 33.3 (33.3-100.0) | 0.93 |
| Temporal (T) (°) | 66.7 (0.0-100.0) | 33.3 (0.0-66.7) | 0.49 |
| Overall (°) | 180.0 (60.0-239.9) | 150.0 (120.0-202.5) | 0.41 |

**Abbreviations:** PEI, phacoemulsification; GSL, goniosynechialysis; GT, goniotomy; Post-op, postoperative. P value were calculated by generalized linear mixed model. Statistics are based on Shapiro-Wilk normality test for each variable. Data were illustrated as median (IQR) - non-normal distribution.
