# Supplementary material
Source: Research Square preprint supplement (doi:10.21203/rs.3.rs-9359614/v1)
Supplement: Supplementary file 8 [file f22106bb7b43f4a4b1b44ea8.docx]

**Table 5. Multivariate analysis of factors associated with the angle opening range and intraocular pressure at postoperative 12 months.**

|  | **Post-op 12 Months Angle Open Range (n=61)** | |  | **Post-op 12 Months IOP (n=61)** | |
| --- | --- | --- | --- | --- | --- |
|  | β （95% CI） | P |  | β （95% CI） | P |
| Basic IOP | -0.07 (-1.794, 1.654) | 0.936 |  | -0.042 (-0.114, 0.030) | 0.249 |
| PEI Angle Open Range | 0.134 (-0.15, 0.418) | 0.356 |  | 0.006 (-0.005, 0.016) | 0.282 |
| Pre-op Medications | -6.395 (-29.474, 16.683) | 0.587 |  | 0.322 (-0.377, 1.022) | 0.366 |
| GT Range | -0.115 (-0.476, 0.246) | 0.532 |  | -0.014 (-0.025, -0.003) | **0.012** |

Table 5. P value were calculated by generalized estimation equation, adjusted by age, 12 months medications types, gender, C/D ratio. **Abbreviations:** PEI, phacoemulsification; GSL, goniosynechialysis; GT, goniotomy; Pre-op, preoperative, PEI Angle Open Range indicated the range of angle opened after phacoemulsification.
