# Supplementary material
Source: Research Square preprint supplement (doi:10.21203/rs.3.rs-9359614/v1)

# Medications

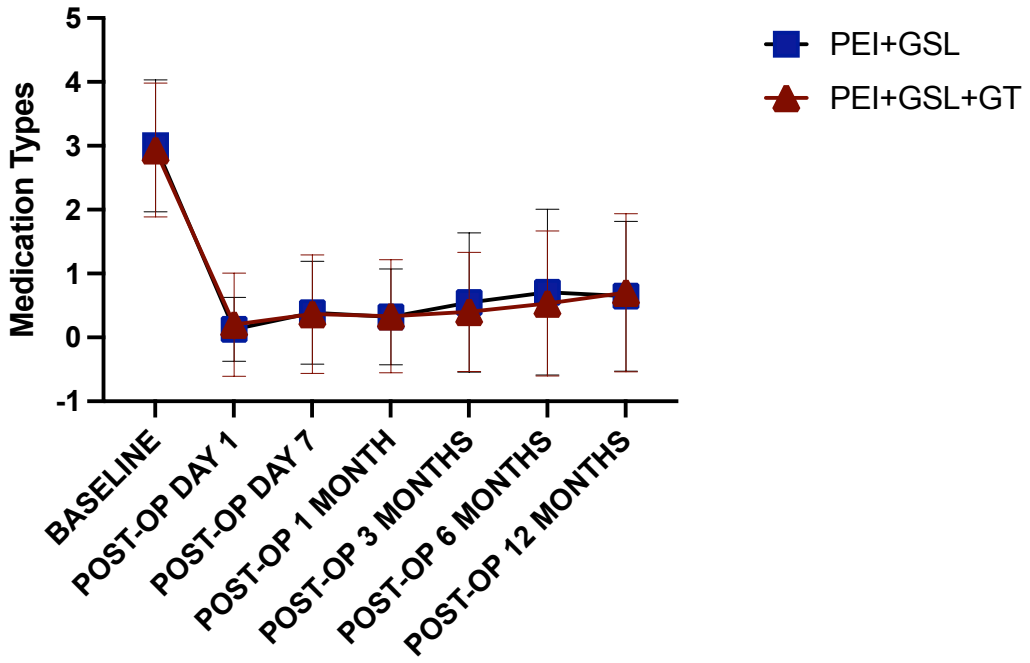

Supplement: Supplementary file 6 [file a133fa25a0380fd7c9c61f16.pdf]
